# Supplementary material
Source: Springer Nature journal article supplement (https://www.springermedizin.de/resource/supplementary/12943_2010_692_MOESM7_ESM.pdf/9554600)

# CD3<sup>+</sup>p53<sup>+</sup>Bcl2<sup>-</sup>NfκB<sup>-</sup>

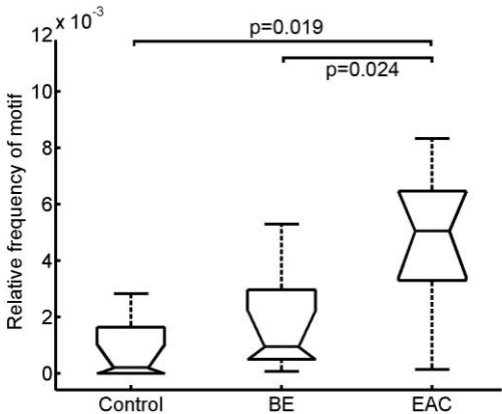

Supplement: MOESM7 [file 9554600]
